# Supplementary material for: In a team forgiveness climate, the influence of paradoxical thinking of leaders on the team voice behavior: Mediated by team cooperation
Source: PubMed Central journal article supplement (PMC8923504; doi:10.1371/journal.pone.0265018), 2022-03-15
Supplement: pone.0265018.s001.pdf [file pone.0265018.s001.pdf]

| idd | sgen_me | sage_me | sedu_me | year_me | teamsize | paradox_r | forge_me | coope_me | tvoyce_me |
|-----|---------|---------|---------|---------|----------|-----------|----------|----------|-----------|
| 11  | 1.00    | 45.00   | 18.00   | 13.00   | 10.00    | 4.11      | 4.25     | 4.38     | 4.00      |
| 21  | 0.00    | 45.00   | 18.00   | 18.00   | 4.00     | 4.11      | 4.25     | 4.19     | 3.67      |
| 31  | 0.00    | 35.00   | 18.00   | 10.00   | 6.00     | 3.89      | 3.50     | 4.00     | 4.00      |
| 41  | 1.00    | 36.00   | 18.00   | 1.00    | 15.00    | 4.00      | 4.75     | 4.20     | 4.83      |
| 51  | 0.00    | 42.00   | 18.00   | 20.00   | 3.00     | 5.00      | 3.50     | 4.08     | 3.50      |
| 61  | 1.00    | 40.00   | 18.00   | 12.00   | 9.00     | 3.67      | 4.00     | 4.25     | 4.83      |
| 71  | 0.00    | 34.00   | 18.00   | 7.00    | 7.00     | 4.22      | 5.00     | 4.21     | 4.67      |
| 81  | 1.00    | 38.00   | 18.00   | 12.00   | 10.00    | 5.00      | 5.00     | 4.08     | 4.83      |
| 91  | 0.00    | 35.00   | 18.00   | 10.00   | 6.00     | 4.33      | 5.00     | 4.25     | 4.00      |
| 101 | 0.00    | 56.00   | 18.00   | 20.00   | 10.00    | 4.11      | 4.00     | 4.10     | 4.17      |
| 111 | 1.00    | 40.00   | 16.00   | 10.00   | 8.00     | 3.11      | 3.00     | 4.04     | 3.67      |
| 121 | 1.00    | 39.00   | 16.00   | 3.00    | 6.00     | 3.89      | 3.25     | 3.83     | 3.67      |
| 131 | 1.00    | 46.00   | 16.00   | 14.00   | 10.00    | 4.33      | 4.50     | 4.04     | 3.33      |
| 141 | 1.00    | 40.00   | 16.00   | 9.00    | 6.00     | 3.78      | 4.25     | 4.13     | 4.33      |
| 151 | 0.00    | 42.00   | 18.00   | 9.00    | 7.00     | 3.56      | 4.00     | 3.75     | 4.33      |
| 161 | 0.00    | 38.00   | 15.00   | 4.00    | 6.00     | 3.89      | 5.00     | 4.38     | 4.00      |
| 171 | 0.00    | 48.00   | 16.00   | 20.00   | 6.00     | 3.89      | 5.00     | 4.25     | 4.67      |
| 181 | 1.00    | 44.00   | 18.00   | 16.00   | 6.00     | 3.56      | 4.00     | 3.88     | 3.83      |
| 191 | 1.00    | 41.00   | 18.00   | 10.00   | 20.00    | 4.22      | 5.00     | 4.33     | 4.67      |
| 201 | 1.00    | 34.00   | 16.00   | 3.00    | 10.00    | 3.78      | 3.75     | 3.83     | 4.33      |
| 211 | 1.00    | 34.00   | 16.00   | 3.00    | 10.00    | 3.78      | 3.75     | 3.75     | 4.33      |
| 221 | 0.00    | 41.00   | 18.00   | 3.00    | 4.00     | 3.78      | 5.00     | 3.75     | 3.50      |
| 231 | 0.00    | 39.00   | 18.00   | 11.00   | 20.00    | 4.33      | 3.75     | 4.50     | 4.50      |
| 241 | 1.00    | 40.00   | 18.00   | 10.00   | 4.00     | 3.33      | 5.00     | 3.81     | 4.83      |
| 251 | 1.00    | 36.00   | 18.00   | 5.00    | 9.00     | 3.22      | 4.75     | 4.30     | 4.33      |
| 261 | 0.00    | 39.00   | 18.00   | 10.00   | 10.00    | 5.00      | 4.75     | 3.92     | 3.33      |
| 271 | 0.00    | 38.00   | 16.00   | 5.00    | 10.00    | 4.22      | 4.00     | 3.75     | 4.00      |
| 281 | 1.00    | 36.00   | 15.00   | 6.00    | 6.00     | 3.56      | 5.00     | 4.13     | 4.00      |
| 291 | 0.00    | 49.00   | 18.00   | 12.00   | 11.00    | 4.78      | 5.00     | 4.29     | 4.83      |
| 301 | 0.00    | 38.00   | 16.00   | 9.00    | 8.00     | 4.00      | 4.75     | 4.00     | 4.00      |
| 311 | 0.00    | 46.00   | 15.00   | 13.00   | 8.00     | 3.89      | 4.00     | 4.08     | 3.83      |
| 321 | 0.00    | 51.00   | 16.00   | 10.00   | 6.00     | 4.11      | 4.25     | 4.17     | 4.33      |
| 331 | 1.00    | 38.00   | 16.00   | 10.00   | 5.00     | 4.33      | 5.00     | 4.15     | 4.17      |
| 341 | 1.00    | 35.00   | 18.00   | 5.00    | 8.00     | 5.00      | 5.00     | 5.00     | 5.00      |
| 351 | 1.00    | 35.00   | 18.00   | 4.00    | 10.00    | 4.44      | 5.00     | 3.88     | 4.00      |
| 361 | 1.00    | 33.00   | 18.00   | 3.00    | 6.00     | 3.67      | 5.00     | 3.83     | 4.00      |
| 371 | 0.00    | 40.00   | 18.00   | 6.00    | 9.00     | 4.00      | 4.75     | 4.21     | 4.00      |
| 381 | 0.00    | 56.00   | 18.00   | 20.00   | 12.00    | 3.67      | 4.00     | 4.33     | 4.17      |
| 391 | 0.00    | 49.00   | 16.00   | 17.00   | 6.00     | 4.00      | 4.00     | 4.21     | 4.00      |
| 401 | 0.00    | 47.00   | 16.00   | 10.00   | 8.00     | 3.56      | 4.00     | 4.33     | 3.83      |
| 411 | 0.00    | 45.00   | 16.00   | 14.00   | 4.00     | 3.33      | 4.00     | 4.25     | 3.83      |
| 421 | 1.00    | 50.00   | 18.00   | 10.00   | 10.00    | 3.00      | 4.50     | 3.83     | 4.50      |
| 431 | 0.00    | 53.00   | 16.00   | 25.00   | 6.00     | 4.33      | 4.50     | 4.38     | 3.33      |
| 441 | 1.00    | 36.00   | 18.00   | 6.00    | 6.00     | 3.89      | 3.75     | 3.67     | 5.00      |
| 451 | 0.00    | 46.00   | 16.00   | 11.00   | 6.00     | 4.00      | 5.00     | 4.55     | 4.00      |
| 461 | 0.00    | 45.00   | 16.00   | 16.00   | 9.00     | 4.44      | 4.25     | 4.42     | 3.83      |
| 471 | 0.00    | 38.00   | 18.00   | 15.00   | 7.00     | 3.56      | 3.75     | 4.29     | 3.83      |
| 481 | 1.00    | 34.00   | 16.00   | 5.00    | 4.00     | 3.22      | 3.75     | 3.58     | 5.00      |
| 491 | 0.00    | 39.00   | 16.00   | 8.00    | 8.00     | 3.22      | 5.00     | 4.00     | 4.33      |
| 501 | 0.00    | 47.00   | 16.00   | 12.00   | 10.00    | 4.89      | 4.25     | 4.33     | 5.00      |
| 511 | 1.00    | 40.00   | 16.00   | 8.00    | 6.00     | 3.78      | 4.00     | 3.75     | 3.67      |
| 521 | 1.00    | 40.00   | 16.00   | 12.00   | 4.00     | 4.11      | 4.75     | 3.81     | 3.83      |
| 531 | 1.00    | 33.00   | 16.00   | 8.00    | 8.00     | 4.11      | 4.75     | 4.33     | 4.33      |

|      |      |       |       |       |       |      |      |      |      |
|------|------|-------|-------|-------|-------|------|------|------|------|
| 541  | 1.00 | 31.00 | 16.00 | 8.00  | 4.00  | 3.56 | 3.00 | 3.58 | 3.17 |
| 551  | 0.00 | 46.00 | 18.00 | 15.00 | 9.00  | 4.56 | 4.00 | 3.96 | 4.00 |
| 561  | 0.00 | 45.00 | 18.00 | 9.00  | 8.00  | 3.44 | 4.00 | 4.15 | 4.17 |
| 571  | 0.00 | 46.00 | 16.00 | 17.00 | 4.00  | 4.33 | 4.00 | 4.25 | 3.83 |
| 581  | 0.00 | 29.00 | 18.00 | 1.50  | 4.00  | 3.89 | 4.00 | 4.19 | 3.83 |
| 591  | 0.00 | 39.00 | 16.00 | 10.00 | 11.00 | 3.89 | 3.75 | 3.88 | 3.67 |
| 601  | 0.00 | 29.00 | 15.00 | 5.00  | 5.00  | 4.44 | 5.00 | 4.31 | 4.67 |
| 611  | 0.00 | 28.00 | 15.00 | 5.00  | 4.00  | 3.22 | 3.50 | 3.94 | 4.00 |
| 621  | 0.00 | 34.00 | 15.00 | 9.00  | 5.00  | 3.56 | 3.75 | 4.13 | 3.33 |
| 631  | 0.00 | 27.00 | 15.00 | 5.00  | 15.00 | 5.00 | 5.00 | 4.56 | 4.67 |
| 641  | 0.00 | 50.00 | 16.00 | 8.00  | 5.00  | 3.67 | 3.75 | 4.00 | 4.00 |
| 651  | 0.00 | 55.00 | 16.00 | 30.00 | 6.00  | 3.33 | 3.25 | 3.94 | 3.67 |
| 661  | 1.00 | 50.00 | 15.00 | 28.00 | 4.00  | 4.00 | 4.00 | 3.83 | 5.00 |
| 671  | 0.00 | 52.00 | 18.00 | 15.00 | 10.00 | 3.33 | 4.25 | 4.38 | 4.17 |
| 681  | 1.00 | 43.00 | 21.00 | 8.00  | 15.00 | 3.56 | 4.00 | 4.00 | 4.33 |
| 691  | 1.00 | 30.00 | 16.00 | 1.00  | 6.00  | 3.33 | 3.75 | 4.13 | 4.50 |
| 701  | 0.00 | 42.00 | 18.00 | 10.00 | 15.00 | 4.11 | 4.75 | 4.33 | 4.67 |
| 711  | 1.00 | 42.00 | 15.00 | 16.00 | 6.00  | 4.11 | 3.75 | 4.08 | 3.83 |
| 721  | 1.00 | 30.00 | 16.00 | 1.00  | 6.00  | 3.33 | 3.75 | 4.13 | 4.50 |
| 731  | 0.00 | 42.00 | 18.00 | 10.00 | 15.00 | 4.11 | 4.75 | 4.33 | 4.67 |
| 741  | 1.00 | 42.00 | 15.00 | 16.00 | 6.00  | 4.11 | 3.75 | 4.08 | 3.83 |
| 751  | 0.00 | 27.00 | 15.00 | 5.00  | 15.00 | 5.00 | 5.00 | 4.56 | 4.67 |
| 761  | 0.00 | 27.00 | 15.00 | 5.00  | 15.00 | 5.00 | 5.00 | 4.56 | 4.67 |
| 771  | 0.00 | 50.00 | 16.00 | 8.00  | 5.00  | 3.67 | 3.75 | 4.00 | 4.00 |
| 781  | 0.00 | 50.00 | 16.00 | 8.00  | 5.00  | 3.67 | 3.75 | 4.00 | 4.00 |
| 791  | 0.00 | 50.00 | 16.00 | 8.00  | 5.00  | 3.67 | 3.75 | 4.00 | 4.00 |
| 801  | 0.00 | 55.00 | 16.00 | 30.00 | 6.00  | 3.33 | 3.25 | 3.94 | 3.67 |
| 811  | 1.00 | 50.00 | 15.00 | 28.00 | 4.00  | 4.00 | 4.00 | 3.83 | 5.00 |
| 821  | 0.00 | 52.00 | 18.00 | 15.00 | 10.00 | 3.33 | 4.25 | 4.38 | 4.17 |
| 831  | 1.00 | 43.00 | 21.00 | 8.00  | 15.00 | 3.56 | 4.00 | 4.00 | 4.33 |
| 841  | 0.00 | 39.00 | 16.00 | 10.00 | 11.00 | 3.89 | 3.75 | 3.88 | 3.67 |
| 851  | 0.00 | 39.00 | 16.00 | 10.00 | 11.00 | 3.89 | 3.75 | 3.88 | 3.67 |
| 861  | 0.00 | 39.00 | 16.00 | 10.00 | 11.00 | 3.89 | 3.75 | 3.88 | 3.67 |
| 871  | 0.00 | 29.00 | 15.00 | 5.00  | 5.00  | 4.44 | 5.00 | 4.31 | 4.67 |
| 881  | 0.00 | 28.00 | 15.00 | 5.00  | 4.00  | 3.22 | 3.50 | 3.94 | 4.00 |
| 891  | 0.00 | 34.00 | 15.00 | 9.00  | 5.00  | 3.56 | 3.75 | 4.13 | 3.33 |
| 901  | 0.00 | 27.00 | 15.00 | 5.00  | 14.00 | 5.00 | 5.00 | 4.56 | 4.67 |
| 911  | 0.00 | 27.00 | 15.00 | 5.00  | 15.00 | 5.00 | 5.00 | 4.56 | 4.67 |
| 921  | 0.00 | 27.00 | 15.00 | 5.00  | 15.00 | 5.00 | 5.00 | 4.56 | 4.67 |
| 931  | 1.00 | 35.00 | 18.00 | 5.00  | 8.00  | 5.00 | 5.00 | 5.00 | 5.00 |
| 941  | 1.00 | 35.00 | 18.00 | 5.00  | 8.00  | 5.00 | 5.00 | 5.00 | 5.00 |
| 951  | 1.00 | 40.00 | 16.00 | 12.00 | 4.00  | 4.11 | 4.75 | 3.81 | 3.83 |
| 961  | 1.00 | 33.00 | 16.00 | 8.00  | 8.00  | 4.11 | 4.75 | 4.33 | 4.33 |
| 971  | 1.00 | 31.00 | 16.00 | 8.00  | 4.00  | 3.56 | 3.00 | 3.58 | 3.17 |
| 981  | 0.00 | 46.00 | 18.00 | 15.00 | 9.00  | 4.56 | 4.00 | 3.96 | 4.00 |
| 991  | 0.00 | 45.00 | 18.00 | 9.00  | 8.00  | 3.44 | 4.00 | 4.15 | 4.17 |
| 1001 | 0.00 | 46.00 | 16.00 | 17.00 | 4.00  | 4.33 | 4.00 | 4.25 | 3.83 |
| 1011 | 0.00 | 29.00 | 18.00 | 1.50  | 4.00  | 3.89 | 4.00 | 4.19 | 3.83 |

ean
